# Supplementary material for: Comparison of Ximelagatran with Warfarin for the Prevention of Venous Thromboembolism after Total Knee Replacement
Source: Atypon-hosted journal article supplement (doi:10.1056/nejmoa035162), 2003-10-30
Supplement: nejmoa035162_appendix.pdf [file nejmoa035162_appendix.pdf]

# Supplementary Appendix 1

This appendix has been provided by the authors to give readers additional information about their work.

Supplement to: Francis CW et al. Comparison of Ximelagatran with Warfarin for the Prevention of Venous Thromboembolism after Total Knee Replacement. *N Engl J Med* 2003;349:1703-12.

Members of the EXULT A Study group are as follows: *Executive Committee*: C.W. Francis (cochair), University of Rochester Medical Center, Rochester, N.Y.; C.W. Colwell, Jr. (cochair), Scripps Clinic, La Jolla, Calif.; P.C. Comp, University of Oklahoma Health Sciences Center, Oklahoma City; J.S. Ginsberg, McMaster University, Hamilton, Ont., Canada; J.R. Lieberman, UCLA Medical Center, Los Angeles; G. Paiement, San Francisco General Hospital, San Francisco; S.D. Berkowitz, J. Whipple, and A. Roth, AstraZeneca, Wilmington, Del.; and I. Nylander, AstraZeneca R&D, Mölndal, Sweden. *Data Safety Monitoring Board*: R.S. Roberts (chair), Hamilton Civic Hospitals Research Center, Hamilton, Ont., Canada; M. Steinberg, Hospital of the University of Pennsylvania, Philadelphia; and A.G.G. Turpie, Hamilton Health Sciences, Hamilton, Ont., Canada. *Independent Central Adjudication Committee*: M. Gent (chair), J. Hirsh, C. Kearon, M. Levine, and J. Weitz, McMaster University, Hamilton, Ont., Canada.

The following institutions and persons participated in the study (principal investigators are denoted by an asterisk): **United States**: *Arkansas* — W.S. Bowen, W.F. Hefley,\* T. Koonce, M. Alexander, S. Moore, K. Mills, D. Jacks, P. Short, L. Hastings, C.W. Deaton, K.A. Martin, R. Sader, R.B. Sorrells,\* W. Duncan; *California* — C.W. Colwell, Jr.,\* S.N. Copp, M. Saeed, K. Ezzet, L. McCoy, P. Paulido, G.W. Bradley,\* S.A. Plunkett, S.M. Ford, S. Braverman, S.T. Gherini,\* S. Croopnick, D. Wentworth, C. DeLemos, B. Feltman, I.L. Gordon,\* S. Anzel, R.M. Conroy, R.S. Gorab, W.C. McMaster, H.B. Skinner, J. Jimenez, T.D. Nguyen, J. Shapiro, A. Vahdat, H. Kim,\* H. Jergeson, R. Sawhney, S. Wall, K. Stanley, A. Sabalvara-Torres, R. Mudiya,\* D. Tapadiya, G.S. Patel, H. Patel, C. Walling, M.J. Jazayerind, S. Bhalla, W. Kim, M. Soroudi, L. Kwong,\* R. Khanna, J. Ballesteros, B. Morrow, P. Muchnic, J. Harvey, D. Feingold, R. Larson, B. Wiley, M.E. Lekawa,\* C.V. Patel, H.B. Skinner, D.D. Kidney, M.M. Schulz, D. Vajgut, C. Libanati,\* F. Taylor, G. Watkins, A. Gustafson, D. Wallace, K. Anderson, S. Schnekenburger, K. Jolley, N. Hamada, O. Hohmann, T.K. Donaldson, A. Firek, D. Barnes, W. Navigato,\* N.J. Halbridge, J.B. Gonzalez, M.T. Mai, S.P. Suzuki, D.D. Kim, R.P. Sakover, G.D. Paiement,\* A. Davidson, E. Ring, D.R. Shah,\* J. Stockwell, J. Kim, M. Shah,\* H. Damuth, G. Vallier,\* C. Caporiccio, D. Smith, S. Roesler, K. Shimansky, M. Schneider, R. White,\* J. Robbins, D. Link, B. Bowman, J. Rodrigo, J. Meehan, M. Wilde, E. Castro, B. Hughes, B. Schillinger; *Colorado* — P.N. Lammens,\* K. Carlton, R.D. Hunter, J. Guyon, J. McDonald, J.D. Papilion,\* R.L. Greenberg, J.P. Lindberg, H.A. Motz, F.K. Yamamoto, T. Nash, R. Allen, M. Dobrow; *Connecticut* — C. Lewis,\* S.F. Schutzer, J.C. Grady-Benson, G.A. Zimmerman, W.J. Glucksman, M. Pederson; *Florida* — D.G. Bramlet,\* L.M. Gnage, R.P. Nantais, R.G. Hamilton, R.L. Swiggett, Jr., B.R. Bolhofner, C.B. Davis, M.J. Smith, L.P. Warter, J.D. Wrench, L. Price, J.A. Rodriguez, W. Lowry, B. Burke, K. Bowen, K. Moore, R. Strioling, P. Pennington, T. Finan, N. Lausch, O.F. Cannon, Jr.,\* R.J. Brill, T.D. Lowell, M.P. French, T.E. Lafferty, J.E. Fletcher, J.H. Huddleston, R.E. Prieto, J.R. Locker, N.F. Burch, K. Duane,\* L.P. Bitting, H.J. Smith, III, M.S. Farber, R.S. Ennis,\* I. Posner, A. Saperstein, R. Simon, P. Tomasello, Jr., P. Baumann, R. Arad, C. Portogues, M. Krarety, S.I. Hakki,\* S. Harwood, J. Hoeldtke, J. Camblin, V. Bilotta, S. Coleman, S. Diaz, W.T. Jackson,\* S. Augustine, L. Derting, J. McAdams, B. Yearty, K. Ballew, D. Darracott, C.M. Davis, D. Siragusa, H.M. Northrup, G.S. Kantor,\* K. Vaughn, N. Joyce, J. Toro, B. Young, R. Sornee, W. Roener, M.J. Koren,\* S.N. Greco, J.A. Jacqmein, R.O. Pohl, Jr., D.M. Helmsworth, F.W. Sanchez, D.M. Robison, S.J. Lancaster, D.A. Whitaker, T. Matthews,\* B. Steingo, R.N. Kishner, A. Zimmerman, B.S. Morris, R. Rohaus, M.J. Rush, L. Mead,\* S.S. Brady, B.L. Woodard, C.E. Stahl, K.D. Lee, C.A. Wilson, G. Ferguson, G. Rego, S. Lagman, H.B. Morris,\* K.A. Krumins, J.B. Billings, J.F. Byrnes, Jr., G. Logsdon, C.A. Roth,\* R.T. Snowden, E.J. Dabezies, Jr., J.G. York, P.L. Bryan, A. Davis, H. Schuele,\* W.A. Hughes, J. Kilgore, C. Abrahamsen, M. Benjamin, R. Strain, Jr.,\* A. Reich, W. Grossman, S. Steinlauf, M. Kravetz; *Georgia* — M. Jove,\* R. Bachner, T. Branch, R. Karsch, M.A. Maslanka, J. Madeley, P. Richin, J. Traub, W. Vanderyt, H. Krebs, J. Minter,\* J. Holland; *Idaho* — C.E. Poole,\* D. McGee, N.C. Femino, J.A. Thomason, T. Hall, I. Davey; *Illinois* — G. Allan,\* K. Rutz, H. Vejvoda, D. Mangan, C.M. Bearss, J. Schopp, G. Magre, R.R. Romanelli,\* R.J. Herrin, D.M. Drew, J. Tennehouse; *Iowa* — J. Kimelman,\* M. Flapan, M. Matthes, R.E. Johnson, M.S. Rosenfeld, T. Kenney, S. Meyer, S. Misol, A. McDaniel, W. Young, K. Kirkpatrick; *Kentucky* — F.A. Burke,\* H. Lockstadt, H. Markowitz, G.L. D'Angelo, N. Ellingsen, V.A. Vaslcek, J. Balthrop, D. Kesheimer, K. Schlenther, J.K. Farris, D. Winebrenner, E.S. Wilhite, P.M. Brown, C. Riley, A.A. Yashar,\* C. Faughn, A. Tapp, E.E. Jacob, A. Decker, P. Linville, J. Sunderland, B.A. Wittmer,\* J.M. Donley, J.E. Mesa, S.L. Davis, C.M. Pinkerton, J. Esser; *Louisiana* — E.J. Lisecki,\* D.A. Bernard, H.J. Hebert, Jr., J.O. Landry, B. Snellgrove; *Maryland* — D. Costolow, D.F. Dalury,\* M.J. Adams, L.F. Kinary, D. Faison, K. Larson, R.K. Chung, E. McKlaughlin; *Montana* — D.L. Woolley,\* P.B. Peterson, M. Stewart; *New Jersey* — G.P. Charko,\* J.W. King, L. George; *New York* — C.W. Francis,\* S.A. Bean, A.D. Boyd, Jr., K.L. Kaplan, P.A. Kouides, J.M. Shults, D.L. Waldman, H.F. Riegler,\* J.D. Marquadt, M.P. Neracker, C.J. Bozzelli, D. Wefferer, J. Schuster, I. Ziv,\* J. Haurnesser, C. Meinking, J. Mitslisky, K. Ammerman, E. Sattelberg, A. Del Balso, M.A. Cook, B. Greenky,\* S.

Greenky, S. Gleason, J. Esce, O. Starton, A.B. Foster; *North Carolina* — T. McCoy,\* J.B. Mason, R.B. McBride, Jr., T.H. Buter, W.G. Moorefield, Jr., W.L. Griffin, M. Ohl, J. Zucker, A.L. Rhyne, III, P.P. Gilbert, T. Fehring, B.V. Darden, II, M.H. Long, A. Smidowicz, J. High, H.Y. Dunaway, III, J.S. Gaul, III, J. Jester, D. DuPuy, M.A. Dobzyniak, O. Grier, B. Jordan, B. Arnold, D.S. Vri; *Ohio* — K.J. Beer,\* J.J. Rusin, B. Martin, B. Connolly, S. Maher; *Oklahoma* — P.C. Comp,\* S.W. Farriester, K.R. Robinson, D.J. Alexander, D. Costolow, J. Nolan, Jr.,\* K. McGuigan, A. Meyers, K. Banglawala, R. Agri, C. Terry, T.K. Bills, D.S. Eingorn, J. Prettyman, R. Collins; *Oregon* — K.C. Buehler,\* D.A. Rogers, S.R. Tyler, R.L. Thomas, M. Dunley; *Pennsylvania* — B.E. Gunlaugson,\* J.M. Moses, I. Katz, D.A. Lowry, V.E. Vena, R.D. Schroeder, P. Lorditch, D.H. LeHew, M. Buday, P. Wolfe, P.A. Lotke,\* J.P. Garino, C. Nelson, W. Ritchie; *South Carolina* — R.J. Friedman,\* E. Walsh, E. Lee, W. Henry; *Texas* — R.H. Emerson, Jr.,\* J.M. Hillyard, R.D. Reitman, L. Higgins, T.R. Tarbox, N. Alexander, T. Wen, G.S. Gill,\* C. Dihenia, A. Romero, T. Hegstrom, J. Icton,\* F.W. Fleming, C. Brown, P. Fairchild, C. Beaudry, R. Garcia, P.C. Peters, Jr.,\* G.E. Maale, M.J. Champine, M.M. Katz, W. Dittman, L. Smith, R. Coker, J. Seaquist,\* K.M. Cusick, C. Bales, T. Fletcher, S.J. Siff,\* G. Landon, J. Wade; *Virginia* — S.C. Mull,\* K. Larson,\* R.K. Chung, E. McKlaughlin, M.W. Wolfe, P.P. Jones, P. Standifer, R. O'Brien, B.A. Bradshaw, A.J. Manville, D.J. Novak, B.A. Torre, B. Spetzler, W.C. Atkinson, J.A. Porter, R.F. O'Brien; *Wisconsin* — M.J. Anderson,\* A.E. Edwards, W.B. Smith, D. Shaw; **Canada:** *Alberta* — M.J. Mant,\* L.M. Larratt, D.B. Russell, A.R. Turner, D. Au, J.G. Cinats, D.W.C. Johnston, M.V. Lavoie, V. Behman, P.A. Donahue, P. Kochanski, L. Haykowsky, G.H. Woolsey, L.K. Bredo,\* R. Perla, W.R. Reikie, T. Pearce, J. Glen, A. Poole, B. Capusten; *British Columbia* — M. Penner,\* R. McCormack, S. Pirani, G. Pate, M. Piper, D. Hodges, L. Vickars,\* P. Galbraith, S. Horlick, D. Werry, J. Barberie, C. Li, G. McKenzie, W. Yu, H. Hawk, K. Stothers, P. Harrison, P. Chipperfield, W. Pisesky,\* D. Boyce, G. O'Conner, T. O'Farrell, J. Oliver, G. Kundrachok, P. McAllister,\* S. Southerland, C. Landells, M. Stanger, D. Lawrence, C. Cameron,\* W. Malone, B. Woodruff, P. Gutmanis, F. Kernachan, J. Bonnell, P. Trepamier, D. O'Keefe; *Manitoba* — V. deKorompay,\* J.E. Irving, G. Pierce, S. Ulrich; *New Brunswick* — S. Dolan,\* B. Archer, S. Connolly, K. Crane; *Ontario* — P. Wells,\* M. Forgie, R. LaRose, P. Murnaghan, J. Aquino, M. Rodger,\* V. Agarwala, J. Brunet, G. Dervin, P. Kim, R. Feibel, A. Giachino, P. Thurston, P. Rasuli, S. Cartier, S. Alary, W. Castle, D. Puskas,\* T. Wilson, T. Boudreau, J. Jones, P. Clark, C. Cullinan, L. Kurisko, F. Abuzgaya,\* H. BenFayed, S. Gallay, M. Hahn, J. Hummel, R. Luba, E. Sue-A-Quan, B. Woolford, E. Urovitz, B. Carter, M. Zwicker, P. Divinec, R. Kaminke, B. Leokard, M. Prieditis, S.W. Bartol,\* G. Slecko, B. Valdya, D. Fleming, G. Koppert, R. Yovanovich, G. Annisette, J. Pepin, J. Drkulec, G. Jasey, N. Bellot, W. Ramsewak, M. Bent,\* J. Faulkner, D. Nemteam, R.M. Brock, E.J. Rumble, M. West, E.C. Orsini, D. Dejewski, R. Stoneman, A. Bass, H. Dief, G.A. Crawford,\* J.P. Delaney, A. Casses, R. Velazquez, B. Pressnail, S. Styling, F. Rabe, W.L. Robinson, P. Voochels, L. Flores,\* C.M. Offierski, J. Ostrowski, D. Zaniol, D.L. Mallett, T. Li, R.G. Josefchak,\* P.F. Robert, D.C. Martin, J.M. Aubin, A.E. Orshinsky, R. Rawson, M.J. Kalchman, D. Nazar, G. Cook, M. Kliman,\* M. Roscoe, G. Vincent, M. Wood, A.M. Maraghy, M. Mehta, M.E.R. Zarnett,\* K. Gray, M. Chomyshyn, T.K. Chan, J.J. Wilson, J. Weiss, B. Smith-Mateschitz, G. Taruli, A. Yee, S. Pang, J. Lowey, S. Menta, A. Addeb, R. Sangster, D. Chesneyak, C. Watson,\* G. Soon-Shiong, N. Wolfson, K.J. Mac Con, D. Nemtean, D. Pham, V.B. Sennik,\* D. Simmonds, J. Stewart, R. Saplys, N. Clements, D. Wilson, H. Cheah, D. Davidson, H. Hink, A. Ahmed, M. Crowther,\* J. Douketis, J. Dobranowski, J. Allen,\* J.R. Turnbull, S.J. Kearney, C. MacDonald, M. Yee, P. Ansari,\* J.Y. Song, B. Rittenhouse, S. Demers, S.R. Orsini, A. Chris,\* T. Hupel, J. Israel, P. Schuringa, D. Stevens, P. Stevenson, K. Tilma, C. McCoy, N. Shenouda, M.J. Kovacs,\* S. MacDonald, R. McCalden, C.H. Rorabeck, R.B. Bourne, P. Kudo, M. Robbins, C. Talbot, R. Harris, D. Peck, P.J. Moroz,\* R. Miller, J. Kelly, C. McIver, F. Thompson, S. Graves, G. Jaroszynski,\* M. Sutherland, G. Butler, J. Thomson, D. Cook; *Prince Edward Island* — A.W. Profit,\* B.E. Ling, B. Grant, J. Goodwin; *Quebec* — C. Demers,\* C. Petitclerc, D. Cantin, P.F. Leblond, J. Lyonnais, R. Delage, C. Doyle, F. Laroche, L. Desjardins,\* A. Milot, L. Couture, M. Normand, M. Ruel, P. Langis; **Israel:** C. Tauber,\* S. Itachak, M. Teshler, R. Lotan, D. Robinson,\* Y. Bar-Ziv, K. Yona, A. Oron, A. Peer, I. Otrimski,\* Z. Cohen, Y. Rosenberger, J. Papo, E. Orron, M. Roffman,\* A. Eyal, B. Bernfeld, M. Schnaider, M. Zaidman, V. Rzetelny,\* Z. Feldbrin, V.S. Treskunov, M. Singer, S. Elias; **Mexico:** F.A. Rico,\* J. García Díaz, B. Reyes Marín, G. Zuñiga Rios, G.E. Meza Reyes,\* R.E. García, V.R.F. Castellanos, I.B. Sequeria, J.M.M. Camacho,\* J.M.J. Avila, F. Vázquez García, R.O.T. Granados, S.B.P. Gonzalez, I.L.V. García, L.F. De La Huerta Villanueva, R.A. Morfin, J.J. Pérez Correa,\* F.J.M. Moreno Delgado, I.R. Galvan, J.A. Penago Paniagua, I. Gutiérrez Mendoza, A.P. Palomino,\* R.A. Nuñez, C.C. Islas, Z.T. Hernández, J.V.G. Soto, A.R.A. Soni, J.E.G. Reyer; **Brazil:** A. Hernandez,\* G.T. Sguizzatto, R. Fecuri, Jr., I. Momiy, J. Batista de Miranda,\* I.H. Barcelos, W.E. de Brito, N.S. Yamada, G.A. Alves, L.M. Ceravollo, M. Moreira,\* T.Y. Neto, M.L. Simonetto, A. Moreira,\* R.P. Buainaim, M.A. de Oliveira, H.K. Farahat, M.A. Percopo,\* J.P.K. Matushita, W. Lemos, D.P.B. de Sousa, N. Severino,\* O.P.A. de Camargo, R. Fecuri, Jr., L.S. Razaboni.
